# Supplementary material for: Multidrug-Resistant and Extensively Drug-Resistant Escherichia coli in Sewage in Kuwait: Their Implications
Source: MDPI journal article supplement (doi:10.3390/microorganisms11102610), 2023-10-23
Supplement: s1 [file s1]

**Supplementary Table S3.** Distribution of resistance in ExPEC (n=14), DEC (n=3) and global clones<sup>a</sup> (n=4)

| Antimicrobial agent     | No. (%) of isolates resistant in |           |               |
|-------------------------|----------------------------------|-----------|---------------|
|                         | ExPEC                            | DEC       | Global clones |
| Cefepime                | 7 (50.0)                         | 1 (33.3)  | 2 (50.0)      |
| Cephalothin             | 14 (100.0)                       | 3 (100.)  | 4 (100.0)     |
| Ceftazidime             | 8 (57.1)                         | 2 (66.7)  | 2 (50.0)      |
| Cefoxitin               | 5 (35.7)                         | 2 (66.7)  | 3 (75.0)      |
| Cefotaxime              | 14 (100.0)                       | 3 (100.0) | 4 (100.0)     |
| Ceftriaxone             | 8 (57.1)                         | 1 (33.3)  | 2 (50.0)      |
| Aztreonam               | 7 (50.0)                         | 1 (33.3)  | 3 (75.0)      |
| Ertapenem               | 1 (7.1)                          | 0 (0.0)   | 1 (25.0)      |
| Meropenem               | 0 (0.0)                          | 0 (0.0)   | 0 (0.0)       |
| Imipenem                | 1 (7.1)                          | 0 (0.0)   | 0 (0.0)       |
| Gentamicin              | 1(7.1)                           | 0 (0.0)   | 0 (0.0)       |
| Streptomycin            | 8 (57.1)                         | 1 (33.3)  | 4 (100.0)     |
| Amikacin                | 3 (21.4)                         | 0 (0.0)   | 2 (50.0)      |
| Amoxyclav               | 9 (64.3)                         | 1 (33.3)  | 4 (100.0)     |
| Ampicillin/Sulbactam    | 4 (28.6)                         | 1 (33.3)  | 1 (25.0)      |
| Piperacillin/Tazobactam | 5 (35.7)                         | 1 (33.3)  | 2 (50.0)      |
| Ampicillin              | 10 (71.4)                        | 2 (66.7)  | 4 (100.0)     |
| Piperacillin            | 13 (92.9)                        | 1 (33.3)  | 4 (100.0)     |
| Trimethoprim            | 5 (35.7)                         | 1 (33.3)  | 1 (25.0)      |
| Co-Trimoxazole          | 3 (21.4)                         | 1 (33.3)  | 1 (25.0)      |
| Tetracycline            | 7 (50)                           | 1 (33.3)  | 3 (75.0)      |
| Ciprofloxacin           | 8 (57.1)                         | 1 (33.3)  | 4 (100.0)     |
| Fosfomycin              | 1 (7.1)                          | 0 (0.0)   | 0 (0.0)       |
| Azithromycin            | 3 (21.4)                         | 1 (33.3)  | 2 (50.0)      |
| Chloramphenicol         | 4 (28.6)                         | 0 (0.0)   | 1 (25.0)      |
| Sulphafurazole          | 6 (42.9)                         | 1 (33.3)  | 3 (75.0)      |
| Polymyxin B             | 4 (28.6)                         | 0 (0.0)   | 0 (0.0)       |
| Colistin                | 2 (14.3)                         | 0 (0.0)   | 0 (0.0)       |

<sup>a</sup>ST 131, ST 648
