# Supplementary material for: Multidrug-Resistant and Extensively Drug-Resistant Escherichia coli in Sewage in Kuwait: Their Implications
Source: MDPI journal article supplement (doi:10.3390/microorganisms11102610), 2023-10-23
Supplement: s1 [file s1]

**Supplementary Table S6.** Cephalosporin resistance, ESBL genes, and production of ESBL.

| Sample no.      | Resistance pattern                                                                    | Presence of resistance gene(s)                                                                            | Production of ESBL <sup>a</sup> |
|-----------------|---------------------------------------------------------------------------------------|-----------------------------------------------------------------------------------------------------------|---------------------------------|
| J133, J211      | R*: Cefepime + Cephalothin + Ceftazidime + Cefoxitin + Cefotaxime + Ceftriaxone       | J133: <i>bla</i> <sub>OXA-1</sub> + <i>ampC</i> + <i>bla</i> <sub>CTX-M</sub> + <i>bla</i> <sub>TEM</sub> | +                               |
|                 |                                                                                       | J211: <i>bla</i> <sub>OXA-1</sub> + <i>bla</i> <sub>CMY-2</sub> + <i>ampC</i>                             | +                               |
| Z304            | IR**: Cefepime + Cefoxitin<br>R: Cephalothin + Ceftazidime + Cefotaxime + Ceftriaxone | <i>ampC</i> + <i>bla</i> <sub>CTX-M</sub> + <i>bla</i> <sub>TEM</sub>                                     | +                               |
| Z92, H164       | IR: Cefepime<br>R: Cephalothin + Ceftazidime + Cefoxitin + Cefotaxime + Ceftriaxone   | Z92: <i>bla</i> <sub>CMY-2</sub> + <i>ampC</i>                                                            | -                               |
|                 |                                                                                       | H164: <i>bla</i> <sub>CMY-2</sub> + <i>ampC</i> + <i>bla</i> <sub>TEM</sub>                               | -                               |
| Z25, J293       | IR: Cefoxitin<br>R: Cefepime + Cephalothin + Ceftazidime + Cefotaxime + Ceftriaxone   | Z25: <i>ampC</i> + <i>bla</i> <sub>CTX-M</sub> + <i>bla</i> <sub>TEM</sub>                                | -                               |
|                 |                                                                                       | J293: <i>ampC</i> + <i>bla</i> <sub>CTX-M</sub>                                                           | +                               |
| Z138            | R: Cefepime + Cephalothin + Ceftazidime + Cefoxitin + Ceftriaxone                     | <i>ampC</i> + <i>bla</i> <sub>TEM</sub>                                                                   | -                               |
| H58             | IR: Ceftazidime + Ceftriaxone<br>R: Cephalothin + Cefoxitin + Cefotaxime              | <i>bla</i> <sub>CMY-2</sub> + <i>ampC</i>                                                                 | -                               |
| Z277            | IR: Ceftriaxone<br>R: Cephalothin + Ceftazidime + Cefoxitin + Cefotaxime              | <i>ampC</i>                                                                                               | -                               |
| J76, H126, J181 | IR: Cefepime + Ceftazidime + Cefoxitin<br>R: Cephalothin + Cefotaxime                 | J76: <i>ampC</i>                                                                                          | -                               |
|                 |                                                                                       | H126, J181: <i>ampC</i> + <i>bla</i> <sub>TEM</sub>                                                       |                                 |
| J152            | IR: Cefepime + Cephalothin + Ceftazidime + Cefoxitin<br>R: Cefotaxime                 | <i>ampC</i>                                                                                               | -                               |
| H80             | IR: Cefepime + Ceftazidime<br>R: Cephalothin + Cefoxitin + Cefotaxime                 | <i>bla</i> <sub>OXA-1</sub> + <i>ampC</i>                                                                 | -                               |
| H29             | IR: Cefepime + Cefoxitin<br>R: Cephalothin + Ceftazidime + Cefotaxime                 | <i>ampC</i> + <i>bla</i> <sub>TEM</sub>                                                                   | -                               |
| H300            | IR: Cefoxitin<br>R: Cefepime + Cephalothin + Ceftazidime + Cefotaxime                 | <i>ampC</i>                                                                                               | -                               |
| H248            | IR: Ceftriaxone<br>R: Cefepime + Cephalothin + Cefoxitin + Cefotaxime                 | <i>ampC</i>                                                                                               | -                               |
| J154            | IR: Cefepime + Cephalothin + Ceftazidime + Ceftriaxone<br>R: Cefotaxime               | <i>ampC</i>                                                                                               | -                               |
| J22, J183       | IR: Cefepime + Ceftazidime<br>R: Cephalothin + Cefotaxime + Ceftriaxone               | J22: <i>ampC</i> + <i>bla</i> <sub>CTX-M</sub> + <i>bla</i> <sub>TEM</sub>                                | -                               |
|                 |                                                                                       | J183: <i>ampC</i> + <i>bla</i> <sub>TEM</sub>                                                             |                                 |
| J132, H306      | IR: Cefepime + Ceftazidime + Ceftriaxone<br>R: Cephalothin + Cefotaxime               | <i>ampC</i> + <i>bla</i> <sub>TEM</sub>                                                                   | -                               |

|                                                                          |                                                                    |                                                                                                           |                                                                       |
|--------------------------------------------------------------------------|--------------------------------------------------------------------|-----------------------------------------------------------------------------------------------------------|-----------------------------------------------------------------------|
| J2, H75, H99, J185, Z199, H189, H224, H225, Z252, J264, Z275, Z302, Z303 | R: Cefepime + Cephalothin + Ceftazidime + Cefotaxime + Ceftriaxone | J2: <i>bla</i> <sub>OXA-1</sub> + <i>ampC</i> + <i>bla</i> <sub>TEM</sub>                                 | J2, H75, H99, J185, Z199, H224, H225, Z252, J264, Z275, Z302, Z303: + |
|                                                                          |                                                                    | H75: <i>ampC</i> + <i>bla</i> <sub>CTX-M</sub>                                                            | H189: -                                                               |
|                                                                          |                                                                    | H99, J185: <i>bla</i> <sub>OXA-1</sub> + <i>ampC</i> + <i>bla</i> <sub>CTX-M</sub>                        |                                                                       |
|                                                                          |                                                                    | Z199, H189, H224, H225, J264, Z75: <i>ampC</i> + <i>bla</i> <sub>CTX-M</sub>                              |                                                                       |
|                                                                          |                                                                    | Z252, Z302, Z303: <i>ampC</i> + <i>bla</i> <sub>CTX-M</sub> + <i>bla</i> <sub>TEM</sub>                   |                                                                       |
| J236                                                                     | IR: Cefepime + Cephalothin + Cefotaxime + Ceftriaxone              | <i>bla</i> <sub>CMY-2</sub> + <i>ampC</i>                                                                 | -                                                                     |
| Z225, Z227                                                               | IR: Cefepime + Ceftriaxone<br>R: Cephalothin + Cefotaxime          | <i>ampC</i> + <i>bla</i> <sub>TEM</sub>                                                                   | -                                                                     |
| J262                                                                     | IR: Cephalothin + Ceftazidime + Ceftriaxone<br>R: Cefotaxime       | <i>ampC</i>                                                                                               | -                                                                     |
| Z248                                                                     | IR: Ceftazidime + Cefotaxime<br>R: Cephalothin + Ceftriaxone       | <i>ampC</i>                                                                                               | -                                                                     |
| J207                                                                     | IR: Ceftazidime + Ceftriaxone<br>R: Cephalothin + Cefotaxime       | <i>ampC</i>                                                                                               | -                                                                     |
| J295                                                                     | IR: Cefoxitin<br>R: Cephalothin + Cefotaxime + Ceftriaxone         | <i>ampC</i>                                                                                               | -                                                                     |
| J291                                                                     | IR: Cefoxitin + Cefotaxime<br>R: Cephalothin + Ceftriaxone         | <i>bla</i> <sub>CMY-2</sub> + <i>ampC</i>                                                                 | -                                                                     |
| J45, Z220                                                                | IR: Cefoxitin + Cefotaxime + Ceftriaxone<br>R: Cephalothin         | J45: <i>ampC</i>                                                                                          | -                                                                     |
|                                                                          |                                                                    | Z220: <i>bla</i> <sub>OXA-1</sub> + <i>bla</i> <sub>CMY-2</sub> + <i>ampC</i> + <i>bla</i> <sub>TEM</sub> |                                                                       |
| H24, H112, J158                                                          | IR: Cefepime + Cefoxitin<br>R: Cephalothin + Cefotaxime            | H24, H112: <i>ampC</i>                                                                                    | -                                                                     |
|                                                                          |                                                                    | J158: <i>ampC</i> + <i>bla</i> <sub>TEM</sub>                                                             |                                                                       |
| J28                                                                      | IR: Cephalothin + Ceftazidime + Cefoxitin<br>R: Cefotaxime         | <i>ampC</i>                                                                                               | -                                                                     |
| Z307                                                                     | IR: Cefoxitin<br>R: Cephalothin + Ceftazidime + Cefotaxime         | <i>ampC</i>                                                                                               | -                                                                     |
| H97                                                                      | IR: Cefepime + Cephalothin + Ceftazidime + Cefotaxime              | <i>ampC</i> + <i>bla</i> <sub>TEM</sub>                                                                   | -                                                                     |
| J296                                                                     | IR: Cefepime<br>R: Cephalothin + Ceftazidime + Cefotaxime          | <i>ampC</i>                                                                                               | -                                                                     |
|                                                                          | IR: Cefepime + Ceftazidime + Cefotaxime                            | J209, H305: <i>ampC</i> + <i>bla</i> <sub>TEM</sub>                                                       | -                                                                     |

|                            |                                                           |                                                                            |         |
|----------------------------|-----------------------------------------------------------|----------------------------------------------------------------------------|---------|
| J209, J235, H305           | R: Cephalothin                                            | J235: <i>ampC</i>                                                          |         |
| J25, H31, J135, J260, H293 | IR: Cefepime + Cephalothin + Ceftazidime<br>R: Cefotaxime | J25, J135, J260: <i>ampC</i>                                               | -       |
|                            |                                                           | H31: <i>ampC</i> + <i>bla</i> <sub>TEM</sub>                               |         |
|                            |                                                           | H293: <i>bla</i> <sub>OXA-1</sub> + <i>ampC</i>                            |         |
| H122, J153                 | IR: Cefepime + Ceftazidime<br>R: Cephalothin + Cefotaxime | H122: <i>ampC</i> + <i>bla</i> <sub>TEM</sub>                              | -       |
|                            |                                                           | J153: <i>ampC</i>                                                          |         |
| Z60, J79                   | IR: Ceftazidime<br>R: Cefepime + Cephalothin + Cefotaxime | Z60: <i>ampC</i> + <i>bla</i> <sub>CTX-M</sub>                             | Z60: +  |
|                            |                                                           | J79: <i>ampC</i> + <i>bla</i> <sub>CTX-M</sub> + <i>bla</i> <sub>TEM</sub> | J79: -  |
| J24, Z222                  | R: Cefepime + Cephalothin + Ceftazidime + Cefotaxime      | J24: <i>ampC</i> + <i>bla</i> <sub>TEM</sub>                               | J24: -  |
|                            |                                                           | Z222: <i>ampC</i> + <i>bla</i> <sub>CTX-M</sub>                            | Z222: + |
| J294                       | IR: Cefepime + Ceftazidime<br>R: Cephalothin              | <i>ampC</i> + <i>bla</i> <sub>TEM</sub>                                    | -       |
| H192                       | IR: Ceftazidime + Ceftriaxone<br>R: Cephalothin           | <i>ampC</i> + <i>bla</i> <sub>TEM</sub>                                    | -       |
| Z306                       | R: Cephalothin + Cefotaxime + Ceftriaxone                 | <i>ampC</i>                                                                | -       |
| J104                       | IR: Cephalothin + Cefotaxime<br>R: Cefoxitin              | <i>ampC</i>                                                                | -       |
| Z201                       | IR: Cefoxitin + Cefotaxime<br>R: Cephalothin              | <i>ampC</i> + <i>bla</i> <sub>CTX-M</sub> + <i>bla</i> <sub>TEM</sub>      | -       |
| H250                       | R: Cephalothin + Cefoxitin + Cefotaxime                   | <i>ampC</i>                                                                | -       |
| Z319                       | IR: Cephalothin + Ceftazidime + Cefotaxime                | <i>ampC</i>                                                                | -       |
| H124, Z281, H304           | IR: Cephalothin + Ceftazidime<br>R: Cefotaxime            | H124, H304: <i>ampC</i> + <i>bla</i> <sub>TEM</sub>                        | -       |
|                            |                                                           | Z281: <i>ampC</i>                                                          |         |
| H166                       | IR: Cefepime + Cephalothin + Cefotaxime                   | <i>ampC</i>                                                                | -       |
| Z198                       | IR: Ceftazidime<br>R: Cephalothin + Cefotaxime            | <i>ampC</i> + <i>bla</i> <sub>TEM</sub>                                    | -       |
| H265                       | R: Cephalothin + Ceftazidime + Cefotaxime                 | <i>ampC</i>                                                                | -       |
| H295                       | IR: Ceftazidime + Cefotaxime<br>R: Cephalothin            | <i>ampC</i> + <i>bla</i> <sub>TEM</sub>                                    | -       |
| Z169, J208, J292           | IR: Cefepime + Cefotaxime<br>R: Cephalothin               | Z169: <i>bla</i> <sub>OXA-1</sub> + <i>ampC</i>                            | -       |
|                            |                                                           | J208: <i>ampC</i> + <i>bla</i> <sub>TEM</sub>                              |         |
|                            |                                                           | J292: <i>ampC</i>                                                          |         |
| H109                       | IR: Cefepime + Cephalothin + Cefotaxime                   | <i>bla</i> <sub>CMY-2</sub> + <i>ampC</i> + <i>bla</i> <sub>TEM</sub>      | -       |
| H103, H104                 | IR: Cefepime + Cephalothin<br>R: Cefotaxime               | H103: <i>ampC</i>                                                          | -       |
|                            |                                                           | H104: <i>ampC</i> + <i>bla</i> <sub>TEM</sub>                              |         |
| J85                        | IR: Cefepime + Cefotaxime<br>R: Cephalothin               | <i>ampC</i> + <i>bla</i> <sub>TEM</sub>                                    | -       |
| H32, Z118                  | IR: Cefepime<br>R: Cephalothin + Cefotaxime               | <i>ampC</i>                                                                | -       |
| Z19                        | IR: Cefepime + Ceftazidime<br>R: Cefotaxime               | <i>ampC</i>                                                                | -       |

|                                                                             |                                   |                                                                       |   |
|-----------------------------------------------------------------------------|-----------------------------------|-----------------------------------------------------------------------|---|
| Z56                                                                         | IR: Cefepime<br>R: Cephalothin    | <i>ampC</i>                                                           | - |
| H195                                                                        | IR: Ceftriaxone<br>R: Cephalothin | <i>ampC</i> + <i>bla</i> <sub>TEM</sub>                               | - |
| H168                                                                        | IR: Ceftazidime<br>R: Cephalothin | <i>ampC</i>                                                           | - |
| H100                                                                        | IR: Cefepime                      | <i>ampC</i>                                                           | - |
| Z4, H51,<br>H78, H79,<br>J97, H106,<br>H110, Z226,<br>Z278, Z280            | IR: Cephalothin + Cefotaxime      | Z4, J97, H106, H110, Z278:<br><i>ampC</i> + <i>bla</i> <sub>TEM</sub> | - |
|                                                                             |                                   | H51, H78, H79, Z226, Z280:<br><i>ampC</i>                             |   |
| J232, Z305,<br>H303                                                         | IR: Cephalothin<br>R: Cefotaxime  | J232: <i>ampC</i>                                                     | - |
|                                                                             |                                   | Z305: <i>ampC</i> + <i>bla</i> <sub>TEM</sub>                         |   |
|                                                                             |                                   | H303: <i>ampC</i> + <i>bla</i> <sub>CTX-M</sub>                       |   |
| Z82, Z84,<br>Z89, Z93,<br>H135, H220,<br>H222, J239,<br>Z279, H272,<br>H302 | IR: Cefotaxime<br>R: Cephalothin  | Z82, Z84, Z89, Z93, H220, J239,<br>H272: <i>ampC</i>                  | - |
|                                                                             |                                   | H135, H222, Z279, H302: <i>ampC</i><br>+ <i>bla</i> <sub>TEM</sub>    |   |
| Z202, J289,<br>H301                                                         | R: Cephalothin + Cefotaxime       | <i>ampC</i>                                                           | - |
| H159, H82                                                                   | IR: Cefotaxime                    | <i>ampC</i>                                                           | - |
| H267                                                                        | R: Cefotaxime                     | <i>ampC</i>                                                           | - |
| H28, J86,<br>H77, H297,<br>Z58, Z88                                         | IR: Cephalothin                   | H28, J86, H77, H297: <i>ampC</i>                                      | - |
|                                                                             |                                   | Z58, Z88: <i>ampC</i> + <i>bla</i> <sub>TEM</sub>                     |   |
| J18, J23,<br>H221, H70,<br>J126                                             | R: Cephalothin                    | J18, J23, H221: <i>ampC</i> + <i>bla</i> <sub>TEM</sub>               | - |
|                                                                             |                                   | H70, J126: <i>ampC</i>                                                |   |

<sup>a</sup>Extended-spectrum  $\beta$ -lactamase

R\*: Resistant

IR\*\*: Intermediate resistant
