# Supplementary material for: Multidrug-Resistant and Extensively Drug-Resistant Escherichia coli in Sewage in Kuwait: Their Implications
Source: MDPI journal article supplement (doi:10.3390/microorganisms11102610), 2023-10-23
Supplement: s1 [file s1]

**Supplementary Table S5.** Differences in resistance of ExPEC (n=14) versus non-ExPEC (n=126) isolates.

| Antimicrobial agent     | No. (%) of isolates resistant in |            | P-value by Chi-square test |
|-------------------------|----------------------------------|------------|----------------------------|
|                         | ExPEC                            | Non-ExPEC  |                            |
| Cefepime                | 7 (50.0)                         | 63 (50.0)  | 1.00                       |
| Cephalothin             | 14 (100.0)                       | 117 (92.6) | 0.600                      |
| Ceftazidime             | 8 (57.1)                         | 59(46.8)   | 0.58                       |
| Cefoxitin               | 5 (35.7)                         | 25 (19.8)  | 0.18                       |
| Cefotaxime              | 14 (100.0)                       | 105 (83.3) | 0.13                       |
| Ceftriaxone             | 8 (57.1)                         | 34 (27.0)  | 0.03                       |
| Aztreonam               | 7 (50.0)                         | 34 (27.0)  | 0.12                       |
| Ertapenem               | 1 (7.1)                          | 3 (2.4)    | 0.31                       |
| Meropenem               | 0 (0.0)                          | 2 (1.6)    | 1.00                       |
| Imipenem                | 1 (7.1)                          | 10 (7.9)   | 1.00                       |
| Gentamicin              | 1(7.1)                           | 6 (4.8)    | 0.53                       |
| Streptomycin            | 8 (57.1)                         | 70 (55.6)  | 1.00                       |
| Amikacin                | 3 (21.4)                         | 17 (13.5)  | 0.42                       |
| Amoxyclav               | 9 (64.3)                         | 72 (57.1)  | 1.00                       |
| Ampicillin/Sulbactam    | 4 (28.6)                         | 46 (36.5)  | 0.57                       |
| Piperacillin/Tazobactam | 5 (35.7)                         | 70 (55.6)  | 0.17                       |
| Ampicillin              | 10 (71.4)                        | 97 (77.0)  | 0.74                       |
| Piperacillin            | 13 (92.9)                        | 105 (83.3) | 0.70                       |
| Trimethoprim            | 5 (35.7)                         | 55 (43.7)  | 0.78                       |
| Co-Trimoxazole          | 3 (21.4)                         | 55 (43.7)  | 0.15                       |
| Tetracycline            | 7 (50)                           | 74 (58.7)  | 0.58                       |
| Ciprofloxacin           | 8 (57.1)                         | 38 (30.2)  | 0.07                       |
| Fosfomycin              | 1 (7.1)                          | 3 (2.4)    | 0.35                       |
| Azithromycin            | 3 (21.4)                         | 10 (7.9)   | 0.13                       |
| Chloramphenicol         | 4 (28.6)                         | 23 (18.3)  | 0.47                       |
| Sulphafurazole          | 6 (42.9)                         | 60 (47.6)  | 0.79                       |
| Polymyxin B             | 4 (28.6)                         | 21 (16.7)  | 0.28                       |
| Colistin                | 2 (14.3)                         | 2 (1.6)    | 0.05                       |
