# Supplementary material for: Multidrug-Resistant and Extensively Drug-Resistant Escherichia coli in Sewage in Kuwait: Their Implications
Source: MDPI journal article supplement (doi:10.3390/microorganisms11102610), 2023-10-23
Supplement: s1 [file s1]

**Supplementary Table S7.** Resistance patterns of, and ESBL production by, global clones.

| Sample no. | Global clones | Resistance pattern in disk diffusion test                                                                                                                                                                                                                                                                             | Positive for resistance genes                                                 | ESBL production with ESBL NDP test |
|------------|---------------|-----------------------------------------------------------------------------------------------------------------------------------------------------------------------------------------------------------------------------------------------------------------------------------------------------------------------|-------------------------------------------------------------------------------|------------------------------------|
| Z222       | ST131         | cefepime, cephalothin, ceftazidime, cefotaxime, aztreonam, streptomycin, amoxycylav, ampicillin, piperacillin, tetracycline, ciprofloxacin, azithromycin, sulphafurazole, polymyxin-B                                                                                                                                 | <i>ampC</i> ,<br><i>bla</i> <sub>CTX-M</sub>                                  | +                                  |
| J211       | ST648         | cefepime, cephalothin, ceftazidime, ceftazidime, cefotaxime, ceftriaxone, aztreonam, ertapenem, streptomycin, amikacin, amoxycylav, ampicillin/sulbactam, piperacillin/tazobactam, ampicillin, piperacillin, trimethoprim, co-trimoxazole, tetracycline, azithromycin, chloramphenicol, ciprofloxacin, sulphafurazole | <i>bla</i> <sub>OXA-1</sub> ,<br><i>bla</i> <sub>CMY-2</sub> ,<br><i>ampC</i> | +                                  |
| H250       | ST648         | cephalothon, ceftazidime, cefotaxime, streptomycin, amoxycylav, ampicillin, piperacillin, ciprofloxacin                                                                                                                                                                                                               | <i>ampC</i>                                                                   | -                                  |
| J295       | ST648         | cephalothon, ceftazidime, cefotaxime, ceftriaxone, aztreonam, imipenem, streptomycin, amikacin, amoxycylav, piperacillin/tazobactam, ampicillin, piperacillin, tetracycline, ciprofloxacin, sulphafurazole                                                                                                            | <i>ampC</i>                                                                   | -                                  |
