# Supplementary material for: Multidrug-Resistant and Extensively Drug-Resistant Escherichia coli in Sewage in Kuwait: Their Implications
Source: MDPI journal article supplement (doi:10.3390/microorganisms11102610), 2023-10-23
Supplement: s1 [file s1]

**Supplementary Table S1.** Antibiotics that were used with their resistance or susceptible zone diameters (mm).<sup>a</sup>

| <b>Antibiotic class:</b><br>Antibiotic (amount in the disk)                                                                                                                            | Resistant                              | Intermediate-resistant                             | Susceptible                            |
|----------------------------------------------------------------------------------------------------------------------------------------------------------------------------------------|----------------------------------------|----------------------------------------------------|----------------------------------------|
| <b>Aminoglycosides</b><br>Gentamicin (10 µg)<br>Streptomycin (10 µg)<br>Amikacin (30 µg)                                                                                               | <13<br><12<br><15                      | 13-14<br>12-14<br>15-16                            | >14<br>>14<br>>16                      |
| <b>Cephalosporins</b><br>Cefepime (30 µg)<br>Cephalothin (30 µg)<br>Ceftazidime (30 µg)<br>Cefoxitin (30 µg)<br>Cefotaxime (30 µg)<br>Ceftriaxone (30 µg)                              | <19<br><15<br><18<br><15<br><23<br><20 | 19-24<br>15-17<br>18-20<br>15-17<br>23-25<br>20-22 | >24<br>>17<br>>20<br>>17<br>>25<br>>22 |
| <b>Penicillins with β-lactamase inhibitors</b><br>Amoxyclav (Amoxicillin/Clavulanic acid) [30 µg (20/10 µg)]<br>Ampicillin/Sulbactam (10/10 µg)<br>Piperacillin/Tazobactam (100/10 µg) | <14<br><12<br><18                      | 14-17<br>12-14<br>18-20                            | >17<br>>14<br>>20                      |
| <b>Penicillin</b><br>Ampicillin (10 µg)                                                                                                                                                | <14                                    | 14-16                                              | >16                                    |
| <b>Ureidopenicillin</b><br>Piperacillin (100 µg)                                                                                                                                       | <18                                    | 18-20                                              | >20                                    |
| <b>Monobactam</b><br>Aztreonam (30 µg)                                                                                                                                                 | <18                                    | 18-20                                              | >20                                    |
| <b>Antifolates</b><br>Trimethoprim (5 µg)<br>Co-trimoxazole (Sulpha/Trimethoprim) (25 µg [23.75/1.25 µg])                                                                              | <11<br><11                             | 11-15<br>11-15                                     | >15<br>>15                             |
| <b>Tetracycline</b><br>Tetracycline (30 µg)                                                                                                                                            | <12                                    | 12-14                                              | >14                                    |
| <b>Carbapenems</b><br>Ertapenem (10 µg)<br>Meropenem (10 µg)<br>Imipenem (10 µg)                                                                                                       | <19<br><20<br><20                      | 19-21<br>20-22<br>20-22                            | >21<br>>22<br>>22                      |

|                                                                |                                              |                 |                 |
|----------------------------------------------------------------|----------------------------------------------|-----------------|-----------------|
| <b>Fluoroquinolone</b><br>Ciprofloxacin (5 µg)                 | <16                                          | 16-20           | >20             |
| <b>Phosphonic acid derivative</b><br>Fosfomicin (200 µg)       | <13                                          | 13-15           | >15             |
| <b>Macrolide</b><br>Azithromycin (15 µg)                       | ≤12                                          | –               | ≥13             |
| <b>Chloramphenicol</b><br>Chloramphenicol (30 µg)              | <13                                          | 13-17           | >17             |
| <b>Sulphonamide</b><br>Sulphafurazole (Sulfisoxazole) (300 µg) | <13                                          | 13-16           | >16             |
| <b>Polymyxins</b><br>Polymyxin B<br>Colistin                   | Growth in<br>polymyxin<br>broth <sup>a</sup> | NA <sup>b</sup> | NA <sup>b</sup> |

<sup>a</sup>Bacteria were tested for susceptibility to polymyxin B and colistin by Rapid Polymyxin NP test.

<sup>b</sup>Not applicable
