# Supplementary material for: Multidrug-Resistant and Extensively Drug-Resistant Escherichia coli in Sewage in Kuwait: Their Implications
Source: MDPI journal article supplement (doi:10.3390/microorganisms11102610), 2023-10-23
Supplement: s1 [file s1]

**Supplementary Table S4.** Differences in resistance of CR *E. coli* (n=14) and CS *E. coli* (n=126) to other antibiotics.

| Antimicrobial agent     | No. of CR <i>E. coli</i> <sup>a</sup><br>(%) | No. of CS <i>E. coli</i><br>(%) | P-value by Chi-square test |
|-------------------------|----------------------------------------------|---------------------------------|----------------------------|
| Cefepime                | 13 (92.9)                                    | 58 (46.0)                       | 0.0011                     |
| Cephalothin             | 14 (100.0%)                                  | 121 (96.0)                      | 1.00                       |
| Ceftazidime             | 10 (71.4)                                    | 59 (46.8)                       | 0.10                       |
| Cefoxitin               | 6 ( 42.9)                                    | 27 ( 21.4)                      | 0.10                       |
| Cefotaxime              | 13 ( 92.9)                                   | 109 (86.5)                      | 0.69                       |
| Ceftriaxone             | 5 (35.7)                                     | 40 (31.8)                       | 0.76                       |
| Aztreonam               | 6 (42.9)                                     | 37 (29.4)                       | 0.36                       |
| Gentamicin              | 0 (0.0)                                      | 7 (5.6)                         | 1.00                       |
| Streptomycin            | 11 (78.6 )                                   | 69 (54.8)                       | 0.15                       |
| Amikacin                | 4 (28.6)                                     | 17 (13.5)                       | 0.24                       |
| Amoxyclav               | 10 (71.4 )                                   | 74 (58.7)                       | 0.41                       |
| Ampicillin/Sulbactam    | 9 (64.3 )                                    | 41 (32.5)                       | 0.040                      |
| Piperacillin/Tazobactam | 8 (57.1 )                                    | 67 (53.2)                       | 1.00                       |
| Ampicillin              | 13 (92.9 )                                   | 80 (63.5)                       | 0.040                      |
| Piperacillin            | 11 (78.6 )                                   | 91 (72.2)                       | 0.76                       |
| Trimethoprim            | 12 (85.7)                                    | 31 (24.6)                       | 0.0001                     |
| Co-Trimoxazole          | 10 (71.4)                                    | 32 (25.4)                       | 0.0009                     |
| Tetracycline            | 11 (78.6)                                    | 54 (42.9)                       | 0.021                      |
| Ciprofloxacin           | 10 (71.4)                                    | 38 (30.2)                       | 0.0052                     |
| Fosfomycin              | 3 (21.4)                                     | 3 (2.4)                         | 0.014                      |
| Azithromycin            | 3 (21.4)                                     | 11(8.7)                         | 0.15                       |
| Chloramphenicol         |                                              | 20 (15.9)                       | 0.0002                     |

|                |           |            |      |
|----------------|-----------|------------|------|
|                | 9 (64.3)  |            |      |
| Sulphafurazole | 9 (64.3)  | 59 (46.8)  | 0.27 |
| Polymyxin B    | 3 (21.4%) | 22 (17.5%) | 0.72 |
| Colistin       | 2 (14.3%) | 2 (1.6%)   | 0.05 |

Resistant and intermediate-resistant isolates were merged.
