# Supplementary material for: Multidrug-Resistant and Extensively Drug-Resistant Escherichia coli in Sewage in Kuwait: Their Implications
Source: MDPI journal article supplement (doi:10.3390/microorganisms11102610), 2023-10-23
Supplement: s1 [file s1]

**Supplementary Table S2.** List of primers used and the cycling parameters for each PCR assay.

| Gene/Clone                                                  | Specific gene               | Primer sequence                         | PCR parameters                                   | Product size (bp) | Reference |
|-------------------------------------------------------------|-----------------------------|-----------------------------------------|--------------------------------------------------|-------------------|-----------|
| Antibiotic resistance genes (cephalosporinase [ESBL] genes) | <i>bla<sub>oxa-1</sub></i>  | F: 5'-CGCAAATGGCACCAGATTCAAC-3'         | 94°C/ 30 s, 63.5°C/ 90 s, 72°C/ 90 s (30 cycles) | 464               | 1         |
|                                                             |                             | R: 5'-TCCTGCACCAGTTTCCCATACAG-3'        |                                                  |                   |           |
|                                                             | <i>bla<sub>CMY-2</sub></i>  | F: 5'-TGATGCAGGAGCAGGCTATTCC-3'         |                                                  | 323               |           |
|                                                             |                             | R: 5'-CTAACGTCATCGGGGATCTGC-3'          |                                                  |                   |           |
|                                                             | <i>bla<sub>ampC</sub></i>   | F: 5'-TGAGTTAGGTTCCGGTCAGCA-3'          |                                                  | 98                |           |
|                                                             |                             | R: 5'-AGTATTTTGTTCGGGGATCG-3'           |                                                  |                   |           |
|                                                             | <i>bla<sub>CTX-M</sub></i>  | F: 5'-ATGTGCAGYACCAGTAARGTKATGGC-3'     |                                                  | 593               |           |
|                                                             |                             | R: 5'-TGGGTRAARTARGTSACCAGAAAYCAGCGG-3' |                                                  |                   |           |
|                                                             | <i>bla<sub>TEM</sub></i>    | F: 5'-TTGCTCACCCAGAAACGCTGGTG-3'        |                                                  | 708               |           |
|                                                             |                             | R: 5'-TACGATACGGGAGGGCTTACC-3'          |                                                  |                   |           |
|                                                             | <i>bla<sub>SHV</sub></i>    | F: 5'-CGCCGGGTATTCTTATTTGTTCGC-3'       |                                                  | 1,016             |           |
|                                                             |                             | R: 5'-TCTTTCCGATGCCGCCGCCAGTCA-3'       |                                                  |                   |           |
| Antibiotic resistance genes (carbapenemase-encoding genes)  | <i>bla<sub>NDM</sub></i>    | F: 5'-GGTGCATGCCCCGGTGAAATC-3'          | 94°C/ 30 s, 60°C/ 90 s, 72°C/ 60 s (30 cycles)   | 660               |           |
|                                                             |                             | R: 5'-ATGCTGGCCTTGGGGAACG-3'            |                                                  |                   |           |
|                                                             | <i>bla<sub>OXA-48</sub></i> | F: 5'-TTGGTGGCATCGATTATCGG-3'           |                                                  | 744               |           |
|                                                             |                             | R: 5'-GAGCACTTCTTTTGTGATGGC-3'          |                                                  |                   |           |
|                                                             | <i>bla<sub>KPC</sub></i>    | F: 5'-ATGTCACGTATCGCCGTC-3'             |                                                  | 863               |           |
|                                                             |                             | R: 5'-AATCCCTCGAGCGCGAGT-3'             |                                                  |                   |           |
|                                                             | <i>bla<sub>IMP</sub></i>    | F: 5'-CCWGATTTAAAAATYGARAAGCTTG-3'      |                                                  | 522               |           |
|                                                             |                             | R: 5'-TGGCCAHGCTTCWAHATTTGCRTC-3'       |                                                  |                   |           |
|                                                             | <i>bla<sub>VIM</sub></i>    | F: 5'-GTTTGGTTCGCATATCGCAAC-3'          |                                                  | 382               |           |
|                                                             |                             | R: 5'-AATGCGCAGCACCAGGATAGAA-3'         |                                                  |                   |           |
|                                                             | <i>bla<sub>GES</sub></i>    | F: 5'-ATCAGCCACCTCTCAATGG-3'            |                                                  | 302               |           |
|                                                             |                             | R: 5'-TAGCATCGGGACACATGAC-3'            |                                                  |                   |           |
| ST131                                                       | ST131                       | F: 5'-GACTGCATTTTCGTCGCCATA-3'          | 94°C/ 30 s, 60°C/ 30 s, 72°C/ 30 s (30 cycles)   | 310               | 2         |
|                                                             |                             | R: 5'-CCGGCGGCATCATAATGAAA-3'           |                                                  |                   |           |
| ST648                                                       | <i>icd96</i>                | F: 5'-ACCACTCCGGTTGGTGGT-3'             | 94°C/ 20 s, 67°C/ 45 s, (30 cycles)              | 297               | 3         |
|                                                             |                             | R: 5'-AGAACACGGCTTAATACCGATG-3'         |                                                  |                   |           |
|                                                             | <i>gyrB87</i>               | F: 5'-ATGGTGCCTTCTGGCCC-3'              |                                                  | 143               |           |
|                                                             |                             | R: 5'-TCTTTGCCGTCGCGCTTA-3'             |                                                  |                   |           |
|                                                             | <i>uidA</i>                 | F: 5'-GCGTCTGTTGACTGGCAGGTGGTGG-3'      |                                                  | 510               |           |
|                                                             |                             | R: 5'-GTTGCCCGCTTCGAAACCAATGCCT-3'      |                                                  |                   |           |

**References for Table S2.**

1. Fernando DM, Tun HM, Poole J, Patidar R, Li R, Mi R, et al. Detection of antibiotic resistance genes in source and drinking water samples from a First Nations community in Canada. *Appl Environ Microbiol.* 2016; 82: 4767–4775.

2. Doumith M, Day M, Ciesielczuk H, Hope R, Underwood A, Reynolds R, et al. Rapid identification of major *Escherichia coli* sequence types causing urinary tract and bloodstream infections. *J Clin Microbiol.* 2015; 53: 160–166.

3. Johnson JR, Johnston BD, Gordon DM. Rapid and specific detection of the

*Escherichia coli* sequence type 648 complex within phylogroup F. J Clin Microbiol. 2017; 55:  
1116–  
1121.
